# Supplementary material
Source: PubMed Central journal article supplement (PMC139904)

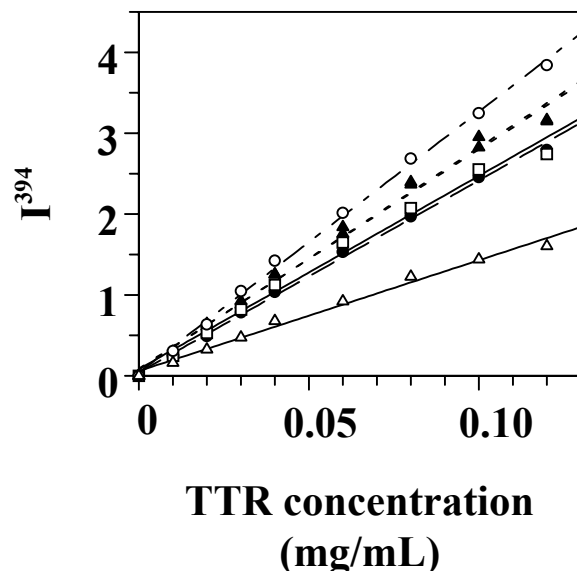

Supplement: pnas_202495199_3.pdf [file pnas_202495199_3.pdf]

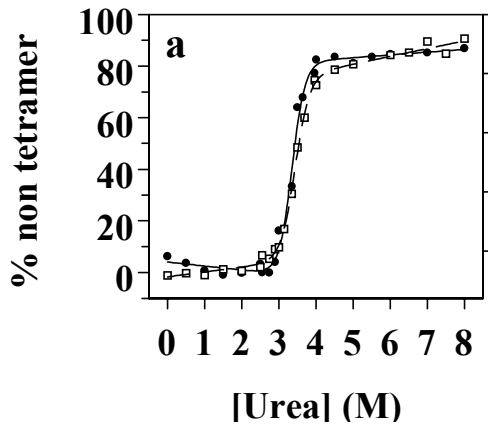

Trp Fluorescence

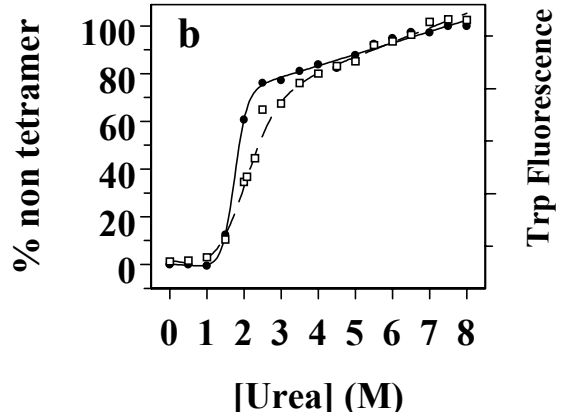

Trp Fluorescence

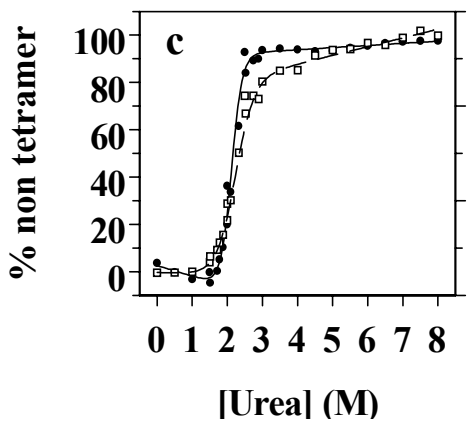

Trp Fluorescence

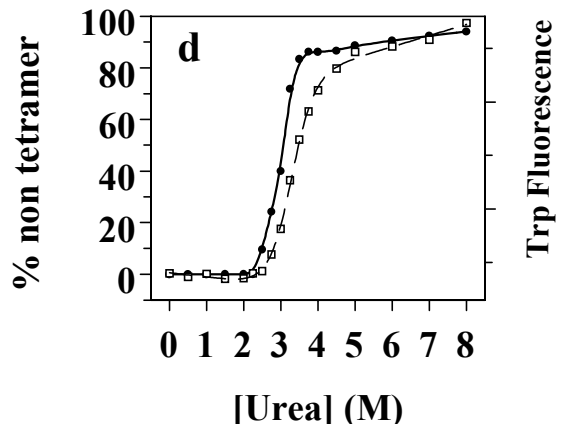

Trp Fluorescence

Supplement: pnas_202495199_4.pdf [file pnas_202495199_4.pdf]
